## CORRECTION

# Correction: Accessing Take-Home Naloxone in British Columbia and the role of community pharmacies: Results from the analysis of administrative data

Amina Moustaqim-Barrette, Kristi Papamihali, Zahra Mamdani, Sierra Williams, Jane A. Buxton

In [Table 4](#), the numbers in the rows under eligibility personally at risk of an overdose and not personally at risk of an overdose are swapped. Please see the correct [Table 4](#) here.

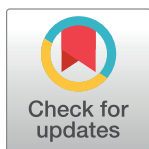

## OPEN ACCESS

**Citation:** Moustaqim-Barrette A, Papamihali K, Mamdani Z, Williams S, Buxton JA (2024) Correction: Accessing Take-Home Naloxone in British Columbia and the role of community pharmacies: Results from the analysis of administrative data. PLoS ONE 19(7): e0308242. <https://doi.org/10.1371/journal.pone.0308242>

**Published:** July 30, 2024

**Copyright:** © 2024 Moustaqim-Barrette et al. This is an open access article distributed under the terms of the [Creative Commons Attribution License](#), which permits unrestricted use, distribution, and reproduction in any medium, provided the original author and source are credited.

Table 4. Adjusted odds ratios and 95% confidence intervals for odds of collecting a kit at pharmacy sites vs other sites.

|                                    | Summary characteristics of analytic sample |                                |                    | Multivariate logistic regression |         |
|------------------------------------|--------------------------------------------|--------------------------------|--------------------|----------------------------------|---------|
|                                    | Pharmacy (N = 3923)                        | Other <sup>C</sup> (N = 53601) | Total (N = 57,524) |                                  |         |
|                                    | n (%)                                      | n (%)                          | n (%)              | AOR (95% CI)                     | P-value |
| <b>Gender</b>                      |                                            |                                |                    |                                  |         |
| Male                               | 2053 (7.0%)                                | 27410 (93.0%)                  | 29458 (51.2%)      | 1.00                             | -       |
| Female                             | 1692 (6.7%)                                | 23426 (93.3%)                  | 25123 (43.6%)      | 0.74 (0.69–0.80)                 | <0.01   |
| Other <sup>B</sup>                 | 121 (11.8%)                                | 903 (88.2%)                    | 1024 (1.8%)        | 1.77 (1.44–2.18)                 | <0.01   |
| Unknown                            | 57 (3.0%)                                  | 1862 (97.0%)                   | 1919 (3.3%)        | 0.39 (0.29–0.52)                 | <0.01   |
| <b>Age</b>                         |                                            |                                |                    |                                  |         |
| Under 19                           | 197 (6.4%)                                 | 2859 (93.6%)                   | 3056 (5.3%)        | 1.00                             | -       |
| 19–30                              | 1466 (7.4%)                                | 18346 (92.6%)                  | 19816 (34.4%)      | 1.41 (1.21–1.66)                 | <0.01   |
| 31–60                              | 1879 (6.1%)                                | 28803 (93.9%)                  | 30689 (53.3%)      | 1.19 (1.02–1.39)                 | 0.03    |
| Over 60                            | 273 (15.3%)                                | 1512 (84.7%)                   | 1787 (3.1%)        | 2.43 (1.99–2.97)                 | <0.01   |
| Unknown                            | 108 (5.0%)                                 | 2068 (95.0%)                   | 2176 (3.8%)        | 1.09 (0.84–1.42)                 | 0.51    |
| <b>Eligibility</b>                 |                                            |                                |                    |                                  |         |
| Personally at risk of overdose     | 1566 (4.0%)                                | 37638 (96.0%)                  | 39204 (68.2%)      | 1.00                             | -       |
| Not personally at risk of overdose | 2357 (12.9%)                               | 15950 (87.1%)                  | 18307 (31.8%)      | 2.69 (2.50–2.90)                 | <0.01   |
| <b>Reason for collecting a kit</b> |                                            |                                |                    |                                  |         |
| 1 <sup>st</sup> kit                | 2880 (10.6%)                               | 24195 (89.4%)                  | 27080 (47.1%)      | 1.00                             | -       |
| Replacement–other <sup>A</sup>     | 347 (3.6%)                                 | 9232 (96.4%)                   | 9579 (16.7%)       | 0.42 (0.37–0.47)                 | <0.01   |
| Replacement–used                   | 696 (3.3%)                                 | 20161 (96.7%)                  | 20865 (36.3%)      | 0.46 (0.42–0.51)                 | <0.01   |
| <b>Health Authority</b>            |                                            |                                |                    |                                  |         |
| Island                             | 532 (3.2%)                                 | 15881 (96.8%)                  | 16413 (28.5%)      | 1.00                             | -       |
| Fraser                             | 1145 (7.0%)                                | 15279 (93.0%)                  | 16424 (28.6%)      | 2.79 (2.50–3.10)                 | <0.01   |
| Interior                           | 923 (7.3%)                                 | 11651 (92.7%)                  | 12574 (21.9%)      | 2.33 (2.08–2.60)                 | <0.01   |
| Northern                           | 208 (5.3%)                                 | 3690 (94.7%)                   | 3898 (6.8%)        | 1.68 (1.42–1.98)                 | <0.01   |
| Vancouver Coastal                  | 1115 (13.6%)                               | 7087 (86.4%)                   | 8215 (14.3%)       | 4.07 (3.65–4.54)                 | <0.01   |

Abbreviations: AOR, Adjusted odds ratio; CI, confidence interval\*Column percentages

<sup>A</sup> Take-home naloxone kit was replaced due to a previous kit being lost, stolen, confiscated or expired

<sup>B</sup> Other genders reported include being trans or gender non-conforming

<sup>C</sup> Other site types include corrections, pharmacy, post-secondary, other (e.g. housing sites, treatment centres, non-governmental and peer-led organizations)

<https://doi.org/10.1371/journal.pone.0308242.t001>

## Reference

1. Moustaqim-Barrette A, Papamihali K, Mamdani Z, Williams S, Buxton JA (2020) Accessing Take-Home Naloxone in British Columbia and the role of community pharmacies: Results from the analysis of administrative data. PLoS ONE 15(9): e0238618. <https://doi.org/10.1371/journal.pone.0238618> PMID: 32915834
